# Supplementary material for: Characteristics of the soil microbial community in the forestland of Camellia oleifera
Source: PeerJ. 2020 May 8;8:e9117. doi: 10.7717/peerj.9117 (PMC7213003; doi:10.7717/peerj.9117)
Supplement: Supplemental Information 1 [file peerj-08-9117-s001.xlsx]

## Sheet: SPRING R
BIOLOG DATE
24h	1	2	3	4	5	6	7	8	9	10	11	12
	0.045	0.047	0.049	0.048	0.052	0.18	0.05	0.051	0.588	0.045	0.047	0.174												0	0.0463333	0.182667	0.0416667		24	48	72	96	120	144	168	192	216		0.000333333	0.00166667	0.00633333	0
	0.044	0.054	0.048	0.062	0.044	0.063	0.048	0.042	0.051	0.307	0.044	0.042												0.00166667	0.00933333	0	0.084	R	0.0171828	0.0155699	0.0326989	0.0585591	0.265054	0.588462	0.843054	1.09949	1.05348		0.00933333	0.00533333	0.00333333	0.00766667
	0.046	0.422	0.045	0.041	0.042	0.046	0.042	0.042	0.044	0.047	0.041	0.043												0.124	0	0	0	N	0.0138817	0.0101505	0.0164516	0.0174946	0.0910215	0.230473	0.294	0.376699	0.438763		0.003	0	0	0.000333333
	0.062	0.041	0.043	0.049	0.079	0.045	0.043	0.041	0.063	0.046	0.043	0.04												0.00166667	0.0106667	0.002	0												0.007	0.00733333	0.00533333	0
	0.043	0.044	0.045	0.039	0.04	0.042	0.07	0.045	0.046	0.049	0.054	0.042												0	0	0.00666667	0.00133333												0.0113333	0	0.00433333	0.0203333
	0.054	0.039	0.04	0.044	0.062	0.046	0.101	0.041	0.05	0.044	0.048	0.042												0	0.00366667	0.017	0												0.008	0.00533333	0.0126667	0.00233333
	0.05	0.042	0.041	0.044	0.04	0.042	0.041	0.044	0.045	0.046	0.047	0.044												0	0	0	0												0.002	0.00133333	0.002	0.294333
	0.046	0.047	0.045	0.037	0.052	0.044	0.041	0.044	0.045	0.045	0.044	0.042												0	0	0	0												0.00233333	0.001	0.00466667	0.00133333
48h
	0.043	0.045	0.05	0.047	0.049	0.237	0.055	0.049	0.094	0.044	0.046	0.377												0	0.065	0.02	0.109667												0.000333333	0.00233333	0.00333333	0.000333333
	0.09	0.067	0.051	0.044	0.066	0.067	0.05	0.045	0.066	0.206	0.045	0.042												0.0233333	0.013	0.00766667	0.0516667												0.01	0.00766667	0.00466667	0.00833333
	0.046	0.45	0.045	0.041	0.042	0.045	0.042	0.042	0.044	0.045	0.041	0.041												0.134333	0	0	0												0.00533333	0.0103333	0.002	0.00166667
	0.062	0.041	0.045	0.043	0.077	0.047	0.045	0.044	0.062	0.049	0.045	0.04												0.00333333	0.00966667	0.00433333	0												0.006	0.00966667	0.007	0
	0.042	0.043	0.044	0.039	0.041	0.082	0.068	0.043	0.044	0.054	0.053	0.041												0	0.008	0.00566667	0.00333333												0.0133333	0.00133333	0.00566667	0.023
	0.052	0.039	0.043	0.044	0.059	0.049	0.085	0.045	0.053	0.045	0.047	0.043												0	0.00466667	0.015	0												0.009	0.007	0.0166667	0.003
	0.047	0.04	0.041	0.044	0.039	0.041	0.04	0.044	0.066	0.044	0.044	0.042												0	0	0.004	0												0.002	0.00333333	0.00433333	0.132333
	0.043	0.047	0.044	0.039	0.045	0.046	0.044	0.048	0.046	0.045	0.043	0.041												0	0	0	0												0.00366667	0.00366667	0.006	0.00133333
72h
	0.17	0.119	0.147	0.087	0.192	0.237	0.098	0.14	0.158	0.109	0.152	0.416												0.000333333	0.027	0	0.0806667												0	0.011	0	0.00166667
	0.464	0.308	0.285	0.194	0.329	0.133	0.096	0.136	0.191	0.382	0.086	0.151												0.207333	0.0736667	0	0.0613333												0.00966667	0.0226667	0.0923333	0.017
	0.129	0.473	0.17	0.172	0.207	0.049	0.084	0.291	0.171	0.054	0.041	0.122												0.112333	0	0.037	0												0.0206667	0	0.0286667	0.00866667
	0.197	0.142	0.097	0.069	0.12	0.145	0.239	0.044	0.106	0.281	0.095	0.153												0.000333333	0	0	0.0313333												0.015	0.00766667	0.0136667	0.0266667
	0.081	0.084	0.137	0.133	0.145	0.653	0.249	0.054	0.223	0.186	0.088	0.177												0	0.165333	0.0303333	0.00533333												0	0	0.0156667	0.098
	0.228	0.168	0.15	0.083	0.127	0.127	0.126	0.221	0.186	0.106	0.051	0.173												0.037	0	0.0326667	0												0.0116667	0.00266667	0	0
	0.155	0.183	0.16	0.215	0.187	0.178	0.113	0.151	0.199	0.216	0.145	0.158												0.021	0.0483333	0.00933333	0.028												0.0193333	0.0133333	0.00133333	0.0576667
	0.172	0.108	0.17	0.127	0.113	0.133	0.113	0.097	0.103	0.116	0.123	0.117												0.005	0	0	0												0.0106667	0.004	0	0.000333333
96h	0.187	0.145	0.151	0.095	0.166	0.283	0.117	0.141	0.176	0.112	0.163	0.037												0	0.0203333	0	0												-0.000333333	0.102333	0.001	0.004
	0.598	0.466	1.174	0.288	0.871	0.126	0.123	0.235	0.315	0.219	0.305	0.199												0.585	0.267333	0.0633333	0.08												0.00633333	0.0283333	0.0473333	0.0323333
	0.13	0.454	0.172	0.145	0.3	0.057	0.083	0.237	0.278	0.058	0.041	0.222												0.091	0.00633333	0.0383333	0												0.026	0	0.0406667	0
	0.212	0.219	0.121	0.071	0.122	0.189	0.235	0.046	0.127	0.27	0.098	0.147												0.023	0	0	0.0106667												0.023	0	0.02	0.0403333
	0.094	0.108	0.112	0.139	0.144	1.43	0.247	0.071	0.172	0.427	0.095	0.184												0	0.41	0.00233333	0.0743333												0	0	0	0.017
	0.288	0.202	0.212	0.086	0.16	0.146	0.133	0.18	0.225	0.156	0.068	0.195												0.073	0	0.0183333	0												0.018	0.00333333	0	0
	0.179	0.212	0.16	0.195	0.179	0.161	0.11	0.143	0.207	0.233	0.133	0.15												0.0226667	0.0173333	0	0.011												0.0236667	0.0246667	0	0.0696667
	0.175	0.12	0.191	0.134	0.132	0.145	0.122	0.102	0.103	0.135	0.13	0.116												0.001	0	0	0												0.0146667	0	0	0
120h	0.183	0.146	0.144	0.125	0.167	0.327	0.185	0.435	0.202	0.116	0.428	0.037												-0.000333333	0.0483333	0.116	0.0356667												0.000333333	0.159667	0.123	0.0796667
	1.305	0.76	1.63	1.23	1.192	0.406	0.841	1.108	0.518	0.109	1.019	0.701												1.07367	0.784667	0.664333	0.451667												0.225667	0.254	0.559333	0.346667
	1.065	0.426	0.308	0.463	0.895	0.057	0.14	0.881	1.014	0.073	0.06	0.409												0.441667	0.313667	0.520333	0.0226667												0.177667	0.105333	0.268	0
	0.769	0.661	0.434	0.103	0.29	0.56	0.541	0.074	0.377	1.114	0.187	0.197												0.463333	0.159667	0.172667	0.341333												0.155	0.0833333	0.0393333	0.141667
	0.102	0.611	0.162	0.196	0.164	2.056	0.804	0.114	0.159	0.737	0.105	0.229												0.133667	0.647333	0.201	0.199												0	0	0	0.0203333
	0.225	1.265	0.235	0.109	0.153	0.609	0.147	0.194	0.175	0.458	0.06	0.233												0.417	0.132333	0.014	0.0923333												0.00266667	0	0	0
	0.175	0.195	0.228	0.792	0.196	0.199	0.208	0.303	0.244	0.243	0.177	0.364												0.0413333	0.237667	0.0936667	0.103333												0	0	0	0.0253333
	0.161	0.172	0.277	0.347	0.167	0.198	0.326	0.289	0.109	0.281	0.194	0.259												0.0453333	0.0793333	0.0833333	0.0866667												0.0546667	0	0	0
144h	0.18	0.166	0.213	0.233	0.172	0.62	0.735	0.66	0.101	0.115	1.33	0.037												0.000333333	0.155667	0.312667	0.308												-0.000333333	0.281333	0.280333	0.158333
	2.228	1.278	2.081	1.945	1.792	2.003	1.665	1.579	1.17	0.135	1.733	1.235												1.67633	1.72733	1.28533	0.848333												0.539667	0.643333	1.125	0.628333
	1.587	0.361	0.601	1.165	1.472	0.056	0.461	1.522	1.627	0.07	0.132	0.828												0.663667	0.711667	1.01733	0.157333												0.371333	0.291333	0.566	0
	1.14	1.174	0.943	0.117	0.545	1.428	1.125	0.109	0.7	1.841	0.582	0.244												0.899667	0.510667	0.458667	0.703												0.478	0.325333	0.122333	0.391333
	0.324	1.299	0.309	0.693	0.176	2.397	0.739	0.151	0.183	1.127	0.18	0.304												0.458	0.902667	0.171667	0.351												0.0753333	0.0183333	0	0.161667
	0.217	1.905	0.411	0.162	0.164	1.107	0.166	0.259	0.494	1.005	0.06	0.4												0.658333	0.291667	0.120333	0.302333												0.0263333	0	0	0
	0.556	0.243	0.685	1.188	0.679	0.231	0.616	1.089	1.186	0.257	0.383	1.044												0.308667	0.513333	0.777667	0.375333												0	0	0	0.0353333
	0.194	0.348	0.905	0.749	0.19	0.495	1.358	0.558	0.131	0.42	1.006	0.604												0.296333	0.292	0.496333	0.490667												0.427333	0	0	0.198667
168h	0.185	0.423	0.194	0.557	0.175	1.541	1.473	0.92	0.102	0.136	1.892	0.037												0.000333333	0.490667	0.564667	0.421333												-0.000333333	0.368667	0.416333	0.198
	2.59	1.924	2.183	2.317	2.307	3.025	2.256	1.862	1.823	0.15	2.229	1.794												1.96533	2.28267	1.71333	1.124												0.683333	0.632	1.44433	0.697667
	1.966	0.096	0.912	1.499	2.313	0.058	0.788	1.761	2.103	0.07	0.259	1.552												0.724333	1.023	1.28367	0.36												0.304	0.407667	0.773	0
	1.701	2.405	1.365	0.299	1.076	2.042	1.57	0.238	1.187	2.258	0.966	0.295												1.55667	0.872	0.731333	0.906												0.714667	0.502667	0.189	0.506333
	0.751	1.784	0.614	1.37	0.448	2.546	0.787	0.26	0.374	1.598	0.363	0.423												0.782667	1.18767	0.206667	0.527667												0.0393333	0.0443333	0	0.0333333
	0.22	2.348	0.583	0.271	0.2	1.698	0.254	0.469	0.478	1.68	0.063	0.511												0.783333	0.456	0.133333	0.484333												0	0	0	0
	1.091	0.394	0.934	1.168	1.281	0.27	1.264	1.815	1.277	0.31	0.802	1.744												0.539333	0.639333	1.185	0.685												0	0	0.110667	0.0926667
	0.691	0.329	1.412	1.122	0.602	0.513	1.629	0.877	0.301	0.413	1.818	1.012												0.543667	0.478667	0.668667	0.814												0.549	0	0	0.407333
																								-0.000333333	0.600667	0.763667	0.599333												-0.000333333	0.336	0.452667	0.322333
																								2.10267	2.33733	1.847	1.48533												0.648333	0.686333	1.55267	0.794667
																								0.934	1.294	1.44167	0.571												0.56	0.613	1.01367	0
																								1.916	1.211	1.17733	1.182												1.05867	0.622	0.318333	0.684333
																								1.118	1.43467	0.61	0.927333												0.043	0.211333	0	0.0533333
																								0.923667	0.646333	0.233667	0.734333												0.00533333	0	0	0
																								0.834667	1.23433	1.63967	0.975333												0	0	0.429333	0.208
																								1.044	0.629333	0.75	0.886333												0.349667	0	0.170667	0.544333
																								-0.000333333	0.673667	0.738333	0.391333												0.000333333	0.374333	0.507333	0.354667
																								1.854	2.058	1.66133	1.524												0.615	0.673667	1.571	0.779
																								0.855333	1.241	1.494	0.415												0.486333	0.734667	1.19967	0
																								1.91467	1.27667	1.254	1.26633												1.413	0.772667	0.47	0.824333
																								1.22433	1.433	0.681	0.998333												0.081	0.417	0	0.148333
																								0.842667	0.569667	0.247	0.681333												0.058	0	0	0
																								0.891	1.27533	1.598	0.854333												0.0233333	0.0216667	0.638667	0.257333
																								1.11433	0.446	0.568333	0.616												0.385	0	0.258	0.537333

## Sheet: SPRING N
BIOLOG DATE
24h	1	2	3	4	5	6	7	8	9	10	11	12
	0.045	0.047	0.047	0.051	0.043	0.049	0.048	0.047	0.062	0.05	0.042	0.043
	0.05	0.066	0.05	0.043	0.043	0.068	0.055	0.048	0.045	0.067	0.05	0.044
	0.051	0.053	0.043	0.041	0.043	0.049	0.044	0.048	0.046	0.044	0.051	0.044
	0.069	0.041	0.049	0.045	0.061	0.054	0.048	0.043	0.063	0.047	0.045	0.044
	0.044	0.046	0.082	0.047	0.042	0.049	0.052	0.05	0.049	0.051	0.103	0.045
	0.059	0.047	0.056	0.044	0.058	0.052	0.078	0.042	0.056	0.05	0.052	0.043
	0.052	0.043	0.049	0.045	0.049	0.048	0.05	0.046	0.048	0.925	0.048	0.048
	0.05	0.048	0.047	0.047	0.048	0.046	0.05	0.054	0.048	0.047	0.049	0.046
48h
	0.042	0.046	0.045	0.05	0.042	0.047	0.047	0.047	0.048	0.048	0.043	0.042
	0.049	0.063	0.05	0.044	0.044	0.067	0.052	0.049	0.045	0.064	0.05	0.043
	0.052	0.053	0.043	0.041	0.072	0.05	0.044	0.048	0.046	0.044	0.05	0.043
	0.061	0.04	0.049	0.046	0.06	0.055	0.048	0.043	0.062	0.043	0.044	0.042
	0.044	0.046	0.082	0.047	0.041	0.048	0.051	0.05	0.048	0.05	0.106	0.045
	0.058	0.047	0.054	0.046	0.053	0.054	0.082	0.044	0.056	0.049	0.05	0.042
	0.051	0.042	0.045	0.047	0.048	0.047	0.05	0.046	0.049	0.439	0.045	0.045
	0.049	0.047	0.047	0.047	0.048	0.048	0.049	0.052	0.049	0.045	0.047	0.044
72h
	0.074	0.061	0.057	0.062	0.073	0.09	0.065	0.062	0.059	0.062	0.074	0.061
	0.064	0.09	0.067	0.068	0.088	0.104	0.32	0.074	0.075	0.082	0.086	0.075
	0.074	0.08	0.1	0.064	0.059	0.056	0.089	0.116	0.073	0.067	0.074	0.077
	0.097	0.057	0.083	0.065	0.076	0.074	0.069	0.069	0.095	0.064	0.134	0.074
	0.048	0.06	0.078	0.052	0.05	0.058	0.067	0.105	0.067	0.292	0.124	0.07
	0.075	0.084	0.068	0.073	0.073	0.054	0.085	0.048	0.056	0.048	0.049	0.07
	0.076	0.102	0.072	0.062	0.092	0.078	0.058	0.083	0.055	0.217	0.066	0.082
	0.085	0.067	0.072	0.08	0.059	0.065	0.051	0.065	0.067	0.048	0.075	0.07
96h	0.083	0.063	0.069	0.062	0.077	0.384	0.09	0.067	0.062	0.064	0.103	0.061
	0.082	0.083	0.07	0.079	0.125	0.097	0.073	0.148	0.137	0.078	0.11	0.125
	0.098	0.08	0.116	0.062	0.057	0.051	0.083	0.159	0.096	0.068	0.065	0.081
	0.119	0.07	0.096	0.064	0.079	0.071	0.088	0.068	0.12	0.081	0.187	0.069
	0.047	0.062	0.073	0.052	0.049	0.055	0.066	0.069	0.066	0.064	0.13	0.073
	0.088	0.116	0.066	0.072	0.095	0.059	0.085	0.075	0.056	0.047	0.048	0.073
	0.101	0.114	0.072	0.061	0.12	0.109	0.062	0.075	0.054	0.279	0.067	0.079
	0.098	0.078	0.084	0.087	0.058	0.065	0.051	0.064	0.073	0.047	0.087	0.075
120h	0.088	0.075	0.426	0.295	0.081	0.691	0.58	0.303	0.074	0.076	0.541	0.21
	0.582	0.083	0.6	0.528	0.729	0.093	0.739	0.641	0.886	0.078	0.718	0.832
	0.816	0.093	0.212	0.302	0.532	0.07	0.171	0.368	0.853	0.082	0.115	0.174
	0.452	0.421	0.18	0.097	0.289	0.452	0.165	0.126	0.415	0.469	0.455	0.089
	0.064	0.444	0.076	0.098	0.072	0.325	0.07	0.108	0.086	0.411	0.134	0.104
	0.106	0.404	0.086	0.095	0.111	0.055	0.084	0.142	0.056	0.048	0.048	0.089
	0.099	0.112	0.147	0.11	0.112	0.098	0.1	0.173	0.083	0.304	0.153	0.207
	0.104	0.136	0.512	0.257	0.074	0.101	0.089	0.168	0.086	0.082	0.111	0.307
144h	0.083	0.078	0.879	0.584	0.08	1.221	1.231	0.578	0.073	0.079	1.071	0.366
	1.134	0.084	1.442	1.455	1.423	0.093	1.622	1.284	1.51	0.078	1.462	1.386
	1.333	0.097	0.725	0.754	1.033	0.128	0.386	0.837	1.516	0.085	0.252	0.362
	0.842	1.197	0.436	0.149	0.525	1.343	0.335	0.219	0.854	1.129	0.981	0.105
	0.069	1.109	0.089	0.162	0.079	0.855	0.083	0.152	0.087	1.068	0.307	0.151
	0.155	0.867	0.098	0.091	0.153	0.055	0.083	0.277	0.056	0.048	0.048	0.089
	0.13	0.141	0.324	0.224	0.196	0.137	0.14	0.444	0.117	0.195	0.484	0.468
	0.106	0.32	1.897	0.535	0.074	0.156	0.134	0.446	0.084	0.174	0.198	1.265
168h	0.082	0.128	1.499	0.887	0.08	1.849	1.845	0.997	0.117	0.132	1.68	0.492
	1.559	0.081	2.12	1.95	1.563	0.093	2.365	1.693	1.985	0.077	1.839	1.887
	1.666	0.117	0.839	1.216	1.353	0.364	0.829	1.284	1.916	0.11	0.409	0.445
	1.24	1.911	0.703	0.424	0.762	2.032	0.565	0.543	1.169	1.586	1.528	0.115
	0.069	1.655	0.104	0.461	0.088	1.294	0.103	0.289	0.091	1.439	0.129	0.242
	0.115	1.366	0.143	0.1	0.135	0.062	0.084	0.382	0.056	0.047	0.048	0.089
	0.207	0.273	0.594	0.553	0.249	0.201	0.468	0.983	0.591	0.207	0.886	0.895
	0.173	0.83	2.354	0.856	0.116	0.255	0.448	0.72	0.119	0.343	0.881	1.708

## Sheet: SUMMER R
BIOLOG DATE
24h	1	2	3	4	5	6	7	8	9	10	11	12
	0.063	0.051	0.045	0.375	0.066	0.142	0.115	0.05	0.046	0.044	0.048	0.043
	0.045	0.125	0.058	0.041	0.047	0.119	0.059	0.051	0.045	0.108	0.056	0.051
	0.045	0.039	0.043	0.046	0.045	0.044	0.047	0.045	0.046	0.039	0.043	0.044
	0.066	0.057	0.045	0.049	0.067	0.056	0.05	0.055	0.067	0.059	0.046	0.05
	0.04	0.125	0.166	0.047	0.054	0.047	0.156	0.053	0.073	0.05	0.048	0.045
	0.082	0.047	0.05	0.047	0.065	0.053	0.055	0.053	0.058	0.048	0.044	0.047
	0.08	0.043	0.327	0.047	0.053	0.048	0.05	0.318	0.046	0.05	0.047	0.046
	0.042	0.049	0.046	0.048	0.044	0.08	0.049	0.049	0.066	0.423	0.046	0.044
48h
	0.069	0.067	0.065	0.393	0.059	0.148	0.222	0.054	0.061	0.057	0.066	0.056
	0.211	0.125	0.26	0.072	0.201	0.112	0.078	0.305	0.139	0.098	0.257	0.15
	0.43	0.052	0.044	0.063	0.369	0.057	0.046	0.048	0.445	0.054	0.044	0.105
	0.158	0.099	0.178	0.049	0.134	0.073	0.103	0.061	0.145	0.103	0.064	0.045
	0.051	0.086	0.161	0.08	0.066	0.175	0.658	0.099	0.065	0.072	0.058	0.07
	0.09	0.131	0.067	0.075	0.096	0.074	0.076	0.086	0.09	0.074	0.062	0.082
	0.092	0.081	0.262	0.055	0.079	0.083	0.051	0.362	0.066	0.067	0.051	0.051
	0.055	0.071	0.11	0.083	0.058	0.095	0.125	0.101	0.08	0.381	0.066	0.067
72h
	0.067	0.061	0.061	0.387	0.054	0.14	0.747	0.06	0.058	0.054	0.073	0.119
	0.819	0.381	1.498	0.426	0.702	0.113	0.652	0.997	0.466	0.092	1.517	0.644
	1.201	0.063	0.048	0.171	1.083	0.079	0.054	0.148	1.083	0.059	0.058	0.285
	0.348	0.754	0.55	0.077	0.264	0.18	0.297	0.096	0.29	0.23	0.176	0.056
	0.057	0.205	0.25	0.256	0.072	1.036	0.74	0.484	0.09	0.109	0.052	0.143
	0.098	1.002	0.062	0.083	0.081	0.154	0.079	0.144	0.086	0.385	0.068	0.131
	0.065	0.109	0.13	0.121	0.092	0.119	0.069	0.411	0.109	0.107	0.065	0.044
	0.091	0.144	0.125	0.294	0.057	0.287	0.323	0.377	0.114	0.478	0.135	0.129
96h
	0.062	0.056	0.059	0.385	0.051	0.087	0.988	0.092	0.055	0.048	0.075	0.195
	1.069	0.73	1.726	1.016	1.037	0.11	1.627	1.614	0.665	0.092	2.016	1.008
	1.202	0.062	0.062	0.357	1.7	0.067	0.085	0.237	1.591	0.055	0.064	0.339
	0.58	1.094	0.903	0.143	0.344	0.641	0.52	0.152	0.415	0.434	0.374	0.058
	0.062	0.388	0.481	0.803	0.083	1.572	0.832	0.86	0.199	0.295	0.059	0.216
	0.137	1.358	0.056	0.086	0.082	0.425	0.07	0.169	0.084	0.725	0.064	0.219
	0.068	0.121	0.775	0.264	0.147	0.157	0.091	0.5	0.24	0.14	0.077	0.119
	0.282	0.239	0.156	0.368	0.055	0.45	0.447	0.522	0.205	0.503	0.295	0.233
120h
	0.059	0.058	0.058	0.245	0.051	0.084	0.881	0.219	0.059	0.046	0.088	0.247
	1.187	0.968	1.245	1.457	1.533	0.103	2.25	2.057	0.874	0.09	2.18	1.511
	1.325	0.062	0.11	0.77	2.001	0.091	0.151	0.417	1.903	0.078	0.073	0.327
	0.791	1.27	1.234	0.37	0.468	1.067	0.609	0.245	0.587	0.935	0.555	0.114
	0.071	0.582	0.667	1.397	0.086	1.961	0.418	0.86	0.549	0.542	0.063	0.253
	0.215	1.42	0.059	0.102	0.091	0.616	0.075	0.238	0.089	0.902	0.075	0.316
	0.166	0.133	0.246	0.411	0.448	0.174	0.139	0.53	0.464	0.228	0.088	0.254
	0.745	0.274	0.174	0.478	0.058	0.57	0.537	0.705	0.239	0.388	1.198	0.339
144h
	0.059	0.087	0.067	0.338	0.058	0.169	0.8	0.363	0.092	0.048	0.109	0.204
	1.087	1.149	0.911	1.807	1.408	0.102	2.431	2.245	0.861	0.097	2.307	1.676
	1.589	0.083	0.125	0.841	2.17	0.15	0.206	0.544	2.065	0.119	0.076	0.732
	0.957	1.6	1.456	0.488	0.557	1.148	0.543	0.312	0.661	1.364	0.688	0.117
	0.063	0.792	0.582	1.612	0.075	1.946	0.231	0.939	0.747	0.707	0.075	0.363
	0.58	1.742	0.075	0.087	0.11	0.839	0.072	0.275	0.089	0.662	0.074	0.6
	0.261	0.182	0.107	0.623	0.726	0.189	0.18	0.646	0.716	0.242	0.102	0.494
	1.339	0.23	0.173	0.655	0.073	0.496	0.715	0.908	0.309	0.332	1.651	0.608
168h
	0.059	0.149	0.073	0.11	0.07	0.506	0.773	0.534	0.116	0.049	0.144	0.203
	0.996	1.154	0.798	1.956	1.306	0.103	2.494	2.309	0.785	0.111	2.232	1.775
	1.781	0.128	0.174	0.945	2.243	0.305	0.263	0.762	2.166	0.209	0.089	0.945
	1.081	1.724	1.677	0.661	0.615	1.331	0.581	0.609	0.786	1.705	0.723	0.176
	0.061	0.954	0.308	1.764	0.072	1.822	0.26	1.071	1.06	0.826	0.064	0.476
	0.756	1.951	0.096	0.074	0.096	1.061	0.065	0.33	0.075	0.69	0.059	0.844
	0.443	0.22	0.084	0.886	0.902	0.219	0.223	0.529	0.863	0.202	0.075	0.554
	1.573	0.232	0.712	0.702	0.059	0.559	0.519	0.96	0.32	0.298	1.886	0.601

## Sheet: SUMMER N
BIOLOG DATE
24h	1	2	3	4	5	6	7	8	9	10	11	12
	0.057	0.175	0.088	0.164	0.079	0.652	0.965	0.76	0.11	0.046	0.214	0.288
	0.931	1.138	0.698	2.143	1.283	0.1	2.633	2.433	0.747	0.103	2.25	1.875
	1.851	0.119	0.256	1.163	2.288	0.466	0.315	1.127	2.238	0.328	0.099	1.103
	1.224	1.823	1.874	0.876	0.87	1.457	0.646	1.142	1.191	1.953	0.924	0.485
	0.062	1.088	0.183	1.835	0.084	1.802	0.392	1.217	1.384	0.925	0.071	0.717
	0.85	1.846	0.117	0.115	0.099	1.239	0.075	0.462	0.077	0.954	0.056	1.037
	0.822	0.278	0.119	1.17	1.065	0.277	0.432	0.749	1.183	0.213	0.073	0.767
	1.749	0.259	1.115	0.864	0.056	0.579	0.668	1.135	0.368	0.311	1.327	0.551
48h	0.05	0.048	0.055	0.048	0.047	0.046	0.044	0.044	0.046	0.042	0.036
	0.1	0.057	0.05	0.049	0.122	0.068	0.04	0.044	0.12	0.048	0.041	0.203
	0.044	0.042	0.037	0.045	0.045	0.044	0.037	0.043	0.043	0.041	0.043	1.775
	0.037	0.038	0.038	0.063	0.055	0.045	0.042	0.064	0.045	0.041	0.039	0.945
	0.036	0.042	0.036	0.038	0.047	0.193	0.075	0.044	0.051	0.042	0.038	0.176
	0.064	0.038	0.037	0.06	0.039	0.05	0.048	0.056	0.043	0.043	0.036	0.476
	0.038	0.042	0.274	0.039	0.04	0.042	0.04	0.042	0.042	0.045	0.507	0.844
	0.044	0.044	0.052	0.046	0.05	0.04	0.047	0.041	0.044	0.043	0.04	0.554
	1.573	0.232	0.712	0.702	0.059	0.559	0.519	0.96	0.32	0.298	1.886	0.601
72h
	0.059	0.087	0.067	0.338	0.058	0.169	0.8	0.363	0.092	0.048	0.109	0.204
	1.087	1.149	0.911	1.807	1.408	0.102	2.431	2.245	0.861	0.097	2.307	1.676
	1.589	0.083	0.125	0.841	2.17	0.15	0.206	0.544	2.065	0.119	0.076	0.732
	0.957	1.6	1.456	0.488	0.557	1.148	0.543	0.312	0.661	1.364	0.688	0.117
	0.063	0.792	0.582	1.612	0.075	1.946	0.231	0.939	0.747	0.707	0.075	0.363
	0.58	1.742	0.075	0.087	0.11	0.839	0.072	0.275	0.089	0.662	0.074	0.6
	0.261	0.182	0.107	0.623	0.726	0.189	0.18	0.646	0.716	0.242	0.102	0.494
	1.339	0.23	0.173	0.655	0.073	0.496	0.715	0.908	0.309	0.332	1.651	0.608
96h
	0.059	0.058	0.058	0.245	0.051	0.084	0.881	0.219	0.059	0.046	0.088	0.247
	1.187	0.968	1.245	1.457	1.533	0.103	2.25	2.057	0.874	0.09	2.18	1.511
	1.325	0.062	0.11	0.77	2.001	0.091	0.151	0.417	1.903	0.078	0.073	0.327
	0.791	1.27	1.234	0.37	0.468	1.067	0.609	0.245	0.587	0.935	0.555	0.114
	0.071	0.582	0.667	1.397	0.086	1.961	0.418	0.86	0.549	0.542	0.063	0.253
	0.215	1.42	0.059	0.102	0.091	0.616	0.075	0.238	0.089	0.902	0.075	0.316
	0.166	0.133	0.246	0.411	0.448	0.174	0.139	0.53	0.464	0.228	0.088	0.254
	0.745	0.274	0.174	0.478	0.058	0.57	0.537	0.705	0.239	0.388	1.198	0.339
120h
	0.062	0.056	0.059	0.385	0.051	0.087	0.988	0.092	0.055	0.048	0.075	0.195
	1.069	0.73	1.726	1.016	1.037	0.11	1.627	1.614	0.665	0.092	2.016	1.008
	1.202	0.062	0.062	0.357	1.7	0.067	0.085	0.237	1.591	0.055	0.064	0.339
	0.58	1.094	0.903	0.143	0.344	0.641	0.52	0.152	0.415	0.434	0.374	0.058
	0.062	0.388	0.481	0.803	0.083	1.572	0.832	0.86	0.199	0.295	0.059	0.216
	0.137	1.358	0.056	0.086	0.082	0.425	0.07	0.169	0.084	0.725	0.064	0.219
	0.068	0.121	0.775	0.264	0.147	0.157	0.091	0.5	0.24	0.14	0.077	0.119
	0.282	0.239	0.156	0.368	0.055	0.45	0.447	0.522	0.205	0.503	0.295	0.233
144h
	0.067	0.061	0.061	0.387	0.054	0.14	0.747	0.06	0.058	0.054	0.073	0.119
	0.819	0.381	1.498	0.426	0.702	0.113	0.652	0.997	0.466	0.092	1.517	0.644
	1.201	0.063	0.048	0.171	1.083	0.079	0.054	0.148	1.083	0.059	0.058	0.285
	0.348	0.754	0.55	0.077	0.264	0.18	0.297	0.096	0.29	0.23	0.176	0.056
	0.057	0.205	0.25	0.256	0.072	1.036	0.74	0.484	0.09	0.109	0.052	0.143
	0.098	1.002	0.062	0.083	0.081	0.154	0.079	0.144	0.086	0.385	0.068	0.131
	0.065	0.109	0.13	0.121	0.092	0.119	0.069	0.411	0.109	0.107	0.065	0.044
	0.091	0.144	0.125	0.294	0.057	0.287	0.323	0.377	0.114	0.478	0.135	0.129
168h
	0.069	0.067	0.065	0.393	0.059	0.148	0.222	0.054	0.061	0.057	0.066	0.056
	0.211	0.125	0.26	0.072	0.201	0.112	0.078	0.305	0.139	0.098	0.257	0.15
	0.43	0.052	0.044	0.063	0.369	0.057	0.046	0.048	0.445	0.054	0.044	0.105
	0.158	0.099	0.178	0.049	0.134	0.073	0.103	0.061	0.145	0.103	0.064	0.045
	0.051	0.086	0.161	0.08	0.066	0.175	0.658	0.099	0.065	0.072	0.058	0.07
	0.09	0.131	0.067	0.075	0.096	0.074	0.076	0.086	0.09	0.074	0.062	0.082
	0.092	0.081	0.262	0.055	0.079	0.083	0.051	0.362	0.066	0.067	0.051	0.051
	0.055	0.071	0.11	0.083	0.058	0.095	0.125	0.101	0.08	0.381	0.066	0.067

## Sheet:  AUTUMN R
BIOLOG DATA
24h	1	2	3	4	5	6	7	8	9	10	11	12
	0.083	0.069	0.074	0.092	0.068	0.07	0.364	0.081	0.099	0.07	0.077	0.205
	0.329	0.101	0.734	0.36	0.366	0.125	0.552	0.595	0.431	0.119	0.302	0.454
	0.269	0.078	0.067	0.105	0.371	0.071	0.076	0.12	0.818	0.077	0.06	0.223
	0.134	0.14	0.091	0.069	0.152	0.124	0.19	0.077	0.148	0.766	0.22	0.077
	0.07	0.215	0.072	0.083	0.084	1.17	0.071	0.088	0.095	1.171	0.082	0.077
	0.096	0.117	0.084	0.086	0.124	0.134	0.113	0.069	0.097	0.11	0.131	0.092
	0.081	0.111	0.066	0.063	0.083	0.072	0.059	0.064	0.073	0.079	0.066	0.054
	0.067	0.082	0.122	0.072	0.074	0.084	0.11	0.126	0.076	0.161	0.161	0.105
48h
	0.062	0.071	0.157	0.326	0.064	0.072	1.476	0.291	0.087	0.083	0.312	0.477
	0.644	0.099	1.842	0.827	1.27	0.139	2.285	1.281	1.229	0.116	1.196	0.971
	1.024	0.065	0.232	0.466	1.213	0.068	0.333	0.581	1.822	0.102	0.391	0.598
	0.463	1.229	0.308	0.082	0.554	0.709	0.7	0.173	0.577	2.736	0.911	0.152
	0.077	0.831	0.067	0.236	0.088	1.964	0.08	0.265	0.14	2.02	0.104	0.128
	0.095	0.601	0.115	0.088	0.11	0.678	0.151	0.081	0.118	0.618	0.37	0.103
	0.094	0.582	0.086	0.063	0.125	0.073	0.123	0.124	0.088	0.077	0.227	0.06
	0.068	0.123	1.078	0.242	0.085	0.312	1.274	0.407	0.08	0.762	0.83	0.284
72h
	0.062	0.099	0.42	0.45	0.064	0.094	1.555	0.61	0.085	0.097	1.211	0.719
	0.923	0.112	1.831	1.345	1.973	0.326	2.702	1.839	1.915	0.111	1.645	1.364
	1.997	0.077	0.64	0.806	1.655	0.068	0.978	1.039	2.412	0.112	1.019	0.83
	0.736	1.952	0.853	0.264	0.883	1.315	1.181	0.259	0.862	3.133	1.482	0.208
	0.137	1.563	0.072	0.58	0.222	2.239	0.089	0.931	0.192	2.346	0.136	0.25
	0.103	1.074	0.167	0.101	0.111	1.371	0.294	0.101	0.137	1.204	0.68	0.123
	0.194	1.493	0.165	0.059	0.66	0.071	0.23	0.482	0.249	0.078	0.32	0.056
	0.109	0.255	1.498	0.517	0.278	0.58	1.908	0.725	0.138	0.595	1.376	0.456
96h
	0.061	0.164	0.453	0.506	0.063	0.13	1.571	0.844	0.08	0.128	1.341	0.928
	0.895	0.306	1.467	1.574	2.376	0.509	2.266	2.019	2.23	0.112	1.851	1.593
	2.429	0.132	1.191	1.109	1.732	0.074	1.63	1.351	2.553	0.125	1.64	1.075
	1.073	2.318	1.13	0.436	0.991	1.755	1.547	0.463	1.062	3.037	1.754	0.26
	0.632	1.841	0.115	0.805	0.441	2.219	0.1	1.157	0.368	2.078	0.352	0.37
	0.116	1.305	0.191	0.211	0.177	1.752	0.423	0.162	0.167	1.455	0.68	0.154
	0.721	1.486	0.333	0.076	1.117	0.09	0.384	0.976	0.539	0.129	0.426	0.071
	0.185	0.346	1.361	0.735	0.551	0.51	1.901	1.012	0.493	0.608	1.485	0.571
120h
	0.061	0.241	0.527	0.599	0.062	0.318	1.628	1.002	0.092	0.17	1.241	1.106
	0.856	0.613	1.98	1.954	2.504	0.667	1.999	2.227	2.381	0.143	1.476	1.669
	2.554	0.53	1.581	1.39	1.891	0.081	2.1	1.555	2.644	0.13	1.937	1.197
	1.491	2.57	1.384	0.732	1.184	2.105	1.793	0.711	1.234	2.919	2.007	0.361
	1.392	2.107	0.188	1.208	0.812	2.378	0.163	1.327	0.671	2.487	0.479	0.409
	0.13	1.524	0.222	0.484	0.179	2.031	0.486	0.403	0.214	1.612	0.816	0.201
	1.178	1.553	0.568	0.114	1.596	0.119	0.524	1.332	0.951	0.186	0.509	0.113
	0.534	0.368	1.347	1.125	0.901	0.554	1.729	1.432	0.904	0.735	1.469	0.789
144h
	0.062	0.392	1.151	0.801	0.062	0.607	2.976	1.444	0.124	0.283	1.211	1.225
	0.867	0.998	3.113	2.289	2.559	0.781	2.536	2.291	2.503	0.239	1.832	1.715
	2.547	0.835	1.54	1.6	2.004	0.103	2.257	1.683	2.733	0.161	2.015	1.373
	1.751	2.701	1.783	0.933	1.393	2.291	1.934	1.023	1.578	2.897	2.209	0.649
	2.182	2.377	0.314	1.717	1.156	2.894	0.199	1.93	0.902	3	0.5	0.552
	0.157	1.79	0.316	0.87	0.199	1.974	0.542	0.724	0.283	1.643	1.341	0.274
	1.695	1.889	0.796	0.154	1.989	0.152	0.763	1.75	1.316	0.216	0.604	0.165
	0.988	0.441	1.356	1.512	1.273	0.555	1.749	2.005	1.333	0.768	1.509	1.109
168h	0.071	0.487	0.63	0.883	0.064	0.902	1.767	1.201	0.132	0.354	1.139	1.324
	0.83	0.679	2.091	2.235	2.554	0.881	2.042	2.327	2.529	0.274	1.592	1.753
	2.529	0.912	1.507	1.833	2.079	0.133	2.174	1.763	2.79	0.192	1.92	1.225
	2.095	2.768	1.921	1.202	1.58	2.393	2.087	1.289	1.757	2.881	2.169	0.836
	2.133	2.496	0.416	1.85	1.514	2.732	0.208	1.886	1.157	2.68	0.469	0.581
	0.15	1.769	0.276	1.121	0.167	2.11	0.582	1.009	0.343	1.683	1.343	0.308
	1.943	1.524	0.78	0.261	2.202	0.163	0.991	1.861	1.581	0.228	0.619	0.194
	1.265	0.395	1.322	1.621	1.594	0.594	1.709	1.974	1.681	0.778	1.577	0.976

## Sheet: AUTUMN N
BIOLOG DATE
24h	1	2	3	4	5	6	7	8	9	10	11	12
	0.07	0.065	0.064	0.058	0.061	0.057	0.071	0.058	0.092	0.057	0.063	0.05
	0.07	0.101	0.135	0.059	0.084	0.112	0.075	0.063	0.083	0.115	0.06	0.157
	0.08	0.058	0.042	0.054	0.081	0.064	0.044	0.054	0.272	0.056	0.046	0.065
	0.103	0.07	0.052	0.05	0.114	0.073	0.062	0.077	0.104	0.113	0.091	0.046
	0.054	0.067	0.079	0.048	0.068	0.06	0.11	0.096	0.059	0.078	0.099	0.05
	0.08	0.054	0.056	0.059	0.087	0.058	0.085	0.064	0.082	0.054	0.059	0.058
	0.063	0.052	0.052	0.045	0.068	0.057	0.049	0.044	0.067	0.058	0.051	0.046
	0.06	0.065	0.094	0.059	0.06	0.075	0.071	0.066	0.066	0.065	0.065	0.203
48h
	0.054	0.055	0.065	0.054	0.052	0.055	0.072	0.097	0.08	0.056	0.063	0.06
	0.612	0.095	0.151	0.265	0.91	0.107	0.231	0.36	0.764	0.099	0.199	0.717
	0.177	0.056	0.069	0.206	0.263	0.063	0.07	0.27	0.409	0.053	0.072	0.15
	0.18	0.293	0.333	0.073	0.216	0.229	0.328	0.134	0.266	0.212	0.509	0.068
	0.063	0.126	0.063	0.074	0.049	0.087	0.079	0.085	0.063	0.12	0.078	0.072
	0.08	0.084	0.089	0.105	0.088	0.074	0.087	0.071	0.077	0.062	0.062	0.057
	0.071	0.05	0.157	0.049	0.11	0.054	0.152	0.051	0.08	0.058	0.189	0.047
	0.06	0.054	0.862	0.055	0.089	0.06	0.781	0.062	0.06	0.056	0.618	0.754
72h
	0.051	0.067	0.102	0.062	0.051	0.062	0.139	0.305	0.068	0.062	0.091	0.246
	1.134	0.159	0.916	0.297	1.39	0.174	1.198	0.657	1.2	0.177	1.089	0.976
	0.282	0.058	0.165	0.287	0.35	0.059	0.186	0.319	0.647	0.05	0.171	0.165
	0.287	0.354	0.562	0.144	0.311	0.359	0.467	0.363	0.619	0.225	1.096	0.191
	0.125	0.337	0.069	0.265	0.072	0.285	0.332	0.214	0.122	0.294	0.078	0.118
	0.075	0.133	0.14	0.239	0.085	0.253	0.097	0.167	0.092	0.069	0.062	0.078
	0.319	0.047	0.232	0.046	0.486	0.048	0.226	0.044	0.278	0.047	0.259	0.039
	0.112	0.053	1.366	0.082	0.358	0.058	1.296	0.089	0.127	0.051	1.028	1.054
96h
	0.05	0.11	0.509	0.098	0.05	0.093	0.444	0.291	0.056	0.092	0.214	0.407
	1.418	0.294	1.336	0.397	1.502	0.325	1.389	0.853	1.49	0.32	1.446	1.062
	0.431	0.058	0.243	0.388	0.472	0.059	0.287	0.354	1.028	0.052	0.212	0.199
	0.452	0.596	0.62	0.207	0.451	0.655	0.484	0.544	1	0.348	1.468	0.241
	0.211	0.492	0.098	0.347	0.27	0.525	0.147	0.327	0.436	0.44	0.152	0.171
	0.07	0.409	0.171	0.281	0.084	0.76	0.131	0.28	0.15	0.118	0.104	0.182
	0.618	0.048	0.332	0.055	0.702	0.046	0.261	0.043	0.454	0.046	0.296	0.039
	0.383	0.054	1.293	0.183	0.635	0.057	1.175	0.248	0.491	0.05	0.969	1.127
120h
	0.049	0.212	1.023	0.282	0.048	0.142	0.554	0.301	0.054	0.143	0.386	0.733
	1.687	0.45	1.445	0.603	1.698	0.421	1.304	1.05	1.739	0.478	1.336	1.13
	0.757	0.139	0.28	0.555	0.734	0.07	0.27	0.438	1.549	0.092	0.248	0.287
	0.693	1.123	0.654	0.302	0.608	1.124	0.551	0.716	1.193	0.668	1.608	0.306
	0.4	0.636	0.127	0.378	0.452	0.737	0.148	0.468	0.819	0.645	0.241	0.241
	0.071	0.506	0.143	0.332	0.086	1.02	0.182	0.338	0.186	0.258	0.176	0.234
	1.004	0.053	0.419	0.08	1.079	0.053	0.309	0.05	0.65	0.054	0.338	0.046
	0.863	0.057	1.278	0.211	1.074	0.059	1.161	0.31	0.938	0.055	0.976	1.119
144h
	0.049	0.503	0.986	0.523	0.048	0.271	0.644	0.52	0.054	0.272	0.438	0.64
	1.905	0.572	1.543	0.845	2.01	0.484	1.22	1.214	1.903	0.602	1.176	1.203
	1.411	0.314	0.351	0.776	1.021	0.092	0.218	0.763	1.879	0.275	0.352	0.482
	1.038	1.546	0.69	0.469	0.777	1.323	0.654	0.821	1.111	1.051	1.465	0.357
	0.723	0.758	0.166	0.394	0.887	0.876	0.17	0.606	1.283	0.828	0.321	0.308
	0.071	0.628	0.156	0.41	0.086	1.193	0.227	0.398	0.245	0.369	0.232	0.244
	1.288	0.059	0.468	0.097	1.343	0.059	0.378	0.054	0.82	0.056	0.354	0.052
	1.44	0.059	1.254	0.354	1.426	0.061	1.147	0.49	1.394	0.059	0.971	1.1
168h
	0.05	0.82	1.051	0.691	0.049	0.479	0.836	0.698	0.055	0.471	0.65	0.669
	1.826	0.679	1.591	1.088	2.184	0.54	1.061	1.332	1.974	0.707	1.073	1.204
	1.745	0.467	0.459	0.947	1.328	0.123	0.209	0.961	2.072	0.451	0.469	0.55
	1.32	1.765	0.725	0.806	0.923	1.748	0.626	0.914	1.108	1.491	1.435	0.36
	1.16	0.919	0.184	0.411	1.38	1.056	0.191	0.738	1.669	1.033	0.358	0.383
	0.064	0.835	0.148	0.448	0.077	1.323	0.267	0.493	0.323	0.505	0.241	0.249
	1.543	0.06	0.487	0.109	1.481	0.059	0.428	0.048	0.985	0.059	0.351	0.056
	1.645	0.057	1.255	0.507	1.847	0.058	1.152	0.727	1.655	0.057	0.974	1.114

## Sheet: WINTER R
BIOLOG DATE
24h	1	2	3	4	5	6	7	8	9	10	11	12
	0.052	0.047	0.072	0.048	0.045	0.045	0.062	0.04	0.052	0.275	0.058	0.042
	0.055	0.073	0.062	0.072	0.056	0.087	0.054	0.057	0.055	0.065	0.051	0.056
	0.051	0.051	0.045	0.044	0.047	0.048	0.044	0.042	0.046	0.276	0.05	0.128
	0.066	0.054	0.048	0.045	0.072	0.055	0.045	0.054	0.066	0.051	0.045	0.071
	0.052	0.052	0.063	0.036	0.055	0.05	0.099	0.064	0.04	0.176	0.07	0.044
	0.087	0.043	0.051	0.043	0.066	0.047	0.061	0.046	0.061	0.049	0.287	0.059
	0.045	0.04	0.046	0.049	0.063	0.06	0.047	0.046	0.049	0.051	0.045	0.049
	0.053	0.051	0.059	0.045	0.054	0.071	0.048	0.054	0.05	0.044	0.054	0.044
48h
	0.063	0.059	0.508	0.052	0.056	0.056	0.69	0.191	0.065	0.109	1.701	0.477
	0.326	0.071	0.727	0.442	0.227	0.084	0.36	0.322	0.257	0.063	0.525	0.552
	0.487	0.089	0.063	0.066	0.354	0.167	0.045	0.101	0.579	0.24	0.062	0.078
	0.704	0.478	0.058	0.248	0.187	0.227	0.149	0.067	0.152	0.307	0.331	0.708
	0.044	0.479	0.063	0.054	0.066	0.112	0.119	0.059	0.058	0.091	0.089	0.057
	0.082	0.072	0.061	0.069	0.094	0.102	0.256	0.073	0.089	0.149	0.269	0.1
	0.06	0.079	0.05	0.051	0.406	0.224	0.056	0.057	0.067	0.06	0.045	0.052
	0.053	0.178	0.177	0.237	0.055	0.152	0.141	0.218	0.071	0.067	0.064	0.428
72h
	0.105	0.064	0.862	0.078	0.06	0.052	1.002	0.361	0.106	0.072	1.834	0.783
	0.695	0.132	1.603	0.842	0.616	0.171	1.449	0.66	0.502	0.062	1.445	1.224
	1.443	0.171	0.318	0.08	1.083	0.396	0.045	0.266	1.275	0.332	0.314	0.381
	1.425	2.256	0.204	0.657	0.839	0.509	0.525	0.264	0.347	0.887	0.818	1.24
	0.074	1.369	0.081	0.069	0.069	0.341	0.1	0.067	0.056	0.306	0.064	0.068
	0.088	0.639	0.088	0.193	0.105	0.414	0.484	0.168	0.085	0.468	0.535	0.336
	0.06	0.126	0.051	0.071	1.124	0.728	0.08	0.12	0.063	0.059	0.054	0.047
	0.052	0.171	0.396	0.662	0.057	0.127	0.494	0.489	0.142	0.122	0.068	0.872
96h	0.218	0.098	0.867	0.105	0.073	0.054	0.994	0.436	0.128	0.049	1.641	1.149
	0.7	0.466	2.163	1.281	0.824	1.113	1.963	0.935	0.948	0.06	1.794	1.819
	1.502	0.267	0.701	0.131	1.511	0.573	0.044	0.452	1.621	0.528	0.63	0.727
	1.655	2.93	0.502	0.762	1.036	0.684	0.774	0.465	0.547	1.063	1.358	1.384
	0.111	1.513	0.095	0.068	0.076	0.534	0.089	0.101	0.072	0.585	0.09	0.104
	0.108	1.294	0.229	0.373	0.151	0.704	0.753	0.558	0.087	0.783	0.801	0.588
	0.131	0.149	0.069	0.212	1.721	1.268	0.116	0.327	0.088	0.083	0.088	0.12
	0.058	0.212	0.744	0.705	0.069	0.161	0.986	0.751	0.38	0.309	0.23	0.908
120h	0.205	0.253	0.901	0.183	0.102	0.063	1.01	0.612	0.223	0.059	2.013	1.599
	0.829	0.824	2.193	1.757	1.089	1.905	2.344	1.28	1.33	0.061	1.909	2.3
	1.824	0.419	1.146	0.233	1.749	0.72	0.044	0.781	1.863	0.765	1.18	1.234
	1.874	2.989	0.655	1.058	1.273	0.978	1.025	0.78	0.915	1.554	1.758	1.511
	0.15	1.956	0.191	0.1	0.079	0.87	0.087	0.218	0.07	0.729	0.127	0.221
	0.135	1.683	0.55	0.518	0.216	1.083	0.826	0.828	0.091	1.012	0.94	0.938
	0.087	0.173	0.064	0.45	2.331	1.607	0.155	0.693	0.096	0.075	0.154	0.379
	0.058	0.246	1.642	1.396	0.092	0.246	1.971	1.007	0.603	0.465	0.408	0.903
144h	0.246	0.74	1.071	0.162	0.1	0.077	1.025	0.739	0.147	0.087	1.908	1.86
	0.791	1.344	2.216	1.988	1.127	1.882	2.638	1.602	1.729	0.061	1.926	2.553
	1.985	0.359	1.456	0.313	2.027	0.969	0.046	0.916	2.08	0.879	1.234	1.526
	1.756	2.964	0.809	1.248	1.472	1.261	1.296	0.966	1.093	1.978	1.984	1.499
	0.188	1.86	0.159	0.123	0.071	1.11	0.081	0.269	0.061	1.147	0.143	0.287
	0.102	2.044	0.685	0.711	0.242	1.346	1.056	1.008	0.101	1.397	1.165	1.136
	0.186	0.185	0.093	0.603	2.28	1.716	0.287	1.027	0.203	0.076	0.18	0.629
	0.056	0.249	1.749	1.008	0.203	0.284	1.914	1.205	0.682	0.392	0.741	0.896
168h	0.277	1.233	1.142	0.179	0.099	0.103	0.98	0.797	0.203	0.145	1.897	2.145
	0.784	1.577	2.194	2.147	1.071	1.634	2.366	1.827	1.849	0.061	1.813	2.611
	2.097	0.269	1.647	0.393	2.132	0.994	0.046	1.064	2.103	0.933	1.159	1.303
	1.659	2.902	0.876	1.539	1.609	1.536	1.431	1.058	1.188	2.107	2.009	1.594
	0.202	1.936	0.15	0.16	0.068	1.254	0.082	0.462	0.064	1.131	0.181	0.314
	0.099	2.266	0.729	0.824	0.234	1.563	1.14	1.079	0.105	1.505	1.276	1.145
	0.399	0.179	0.13	0.676	2.151	1.854	0.516	1.304	0.338	0.082	0.2	0.823
	0.061	0.225	1.728	0.917	0.272	0.274	1.851	1.297	0.648	0.388	0.807	0.876

## Sheet: WINTER N
BIOLOG DATE
24h	1	2	3	4	5	6	7	8	9	10	11	12
	0.046	0.044	0.045	0.047	0.053	0.045	0.047	0.044	0.049	0.044	0.043	0.04
	0.043	0.061	0.047	0.046	0.045	0.057	0.046	0.044	0.046	0.064	0.047	0.044
	0.046	0.046	0.043	0.046	0.046	0.044	0.043	0.04	0.048	0.039	0.044	0.043
	0.056	0.051	0.038	0.056	0.055	0.038	0.043	0.048	0.064	0.04	0.045	0.04
	0.04	0.047	0.136	0.036	0.039	0.051	0.141	0.04	0.044	0.046	0.052	0.049
	0.055	0.037	0.039	0.04	0.057	0.038	0.042	0.04	0.048	0.043	0.049	0.049
	0.046	0.039	0.036	0.042	0.043	0.038	0.043	0.041	0.043	0.042	0.049	0.049
	0.046	0.045	0.042	0.042	0.046	0.061	0.043	0.051	0.046	0.043	0.043	0.049
48h
	0.059	0.055	0.066	0.049	0.265	0.062	0.416	0.112	0.056	0.06	0.084	0.052
	0.233	0.059	0.082	0.37	0.172	0.057	0.072	0.193	0.064	0.065	0.165	0.762
	0.112	0.065	0.042	0.109	0.42	0.061	0.044	0.147	0.411	0.167	0.054	0.127
	0.67	0.198	0.103	0.505	0.161	0.123	0.045	0.275	0.272	0.356	0.076	0.316
	0.053	0.107	0.102	0.097	0.057	0.117	0.119	0.069	0.068	0.206	0.064	0.066
	0.092	0.112	0.316	0.121	0.097	0.149	0.11	0.1	0.092	0.157	0.274	0.047
	0.068	0.059	0.039	0.067	0.125	0.054	0.047	0.075	0.407	0.063	0.05	0.181
	0.057	0.087	0.077	0.377	0.056	0.075	0.067	0.079	0.055	0.089	0.048	0.105
72h
	0.051	0.05	0.497	0.273	0.348	0.057	0.894	0.436	0.053	0.052	0.324	0.176
	0.414	0.058	0.114	0.825	0.464	0.055	0.425	0.619	0.311	0.064	1.416	0.892
	0.307	0.062	0.041	0.222	1.198	0.052	0.043	0.573	1.396	0.395	0.227	0.611
	1.038	0.32	0.232	1.112	0.423	0.388	0.071	0.513	0.478	0.726	0.151	0.656
	0.052	0.878	0.089	0.349	0.064	0.322	0.094	0.245	0.111	0.505	0.119	0.066
	0.087	1.025	0.591	0.28	0.085	0.533	0.268	0.35	0.094	1.038	0.212	0.063
	0.076	0.07	0.427	0.105	0.416	0.06	0.102	0.249	0.548	0.074	0.061	0.201
	0.054	0.257	0.314	0.635	0.064	0.079	0.105	0.279	0.071	0.186	0.061	0.382
96h	0.05	0.056	0.736	0.404	0.349	0.056	0.824	0.516	0.05	0.051	0.433	0.427
	0.644	0.056	0.287	0.89	0.521	0.055	1.297	0.969	0.433	0.082	1.885	1.129
	0.583	0.06	0.041	0.298	1.532	0.051	0.044	0.86	1.962	0.571	0.438	0.704
	1.341	0.379	0.368	1.685	0.561	0.571	0.129	0.614	0.578	0.958	0.213	0.87
	0.055	1.55	0.075	0.585	0.066	0.404	0.074	0.434	0.134	0.716	0.639	0.069
	0.084	1.42	0.746	0.474	0.082	0.824	0.349	0.637	0.092	1.526	0.29	0.069
	0.077	0.083	1.214	0.114	0.658	0.063	0.213	0.61	1.298	0.078	0.1	0.238
	0.068	0.451	0.617	0.821	0.071	0.079	0.209	0.304	0.072	0.477	0.066	0.77
120h	0.048	0.076	0.752	0.38	0.281	0.057	0.757	0.839	0.049	0.051	0.478	0.794
	0.721	0.055	1.245	0.99	0.582	0.054	1.795	1.222	0.477	0.079	2.084	1.054
	0.608	0.06	0.042	0.327	1.763	0.05	0.042	1.026	2.269	0.751	0.708	0.756
	1.312	0.712	0.509	1.882	0.727	0.561	0.163	0.55	0.637	1.204	0.239	0.923
	0.056	1.874	0.077	0.885	0.059	0.544	0.068	0.514	0.139	0.91	0.621	0.077
	0.087	1.639	0.902	0.555	0.08	1.085	0.391	0.97	0.09	1.925	0.229	0.078
	0.093	0.084	1.705	0.124	0.781	0.065	0.259	0.767	1.328	0.081	0.191	0.457
	0.073	0.351	1.447	0.879	0.075	0.079	0.366	0.333	0.073	0.372	0.078	0.732
144h	0.054	0.122	0.72	0.321	0.238	0.065	0.681	0.648	0.049	0.048	0.492	0.959
	0.895	0.056	1.376	1.016	0.629	0.055	2.173	1.305	0.431	0.079	1.948	1.091
	0.722	0.064	0.043	0.456	1.876	0.049	0.041	1.045	2.269	0.845	1.052	0.701
	1.258	0.752	0.582	1.968	0.828	0.527	0.131	0.623	0.59	1.167	0.251	0.948
	0.05	1.912	0.07	0.772	0.047	0.603	0.058	0.528	0.124	1.001	0.935	0.079
	0.073	1.657	0.982	0.55	0.065	1.291	0.419	1.184	0.075	2.064	0.236	0.112
	0.085	0.075	2.122	0.123	0.814	0.057	0.183	0.93	1.456	0.071	0.318	0.565
	0.052	0.394	1.836	0.975	0.064	0.061	0.53	0.312	0.052	0.612	0.081	0.691
168h	0.047	0.134	0.765	1.369	0.397	0.077	0.833	1.332	0.048	0.046	0.496	1.096
	1.373	0.054	2.062	1.427	0.695	0.055	2.728	1.443	1.889	0.079	2.406	2.087
	0.609	0.071	0.043	0.947	2.215	0.073	0.041	1.457	2.513	1.056	1.225	1.878
	1.232	0.636	0.711	2.278	1.39	1.404	0.404	1.521	0.725	1.517	0.646	0.952
	0.056	2.254	0.095	1.484	0.068	0.843	0.09	1.593	0.32	1.346	1.325	0.263
	0.118	2.39	1.223	1.046	0.11	1.736	0.462	1.659	0.109	2.037	0.627	0.173
	0.118	0.088	2.329	0.318	1.076	0.071	0.484	1.235	2.021	0.097	0.493	0.988
	0.072	0.48	2.18	1.236	0.098	0.094	1.295	0.346	0.073	1.69	0.147	1.017
